# Supplementary material
Source: Springer Nature journal article supplement (https://www.springermedizin.de/resource/supplementary/12872_2006_138_MOESM2_ESM.pdf/9431100)

**A**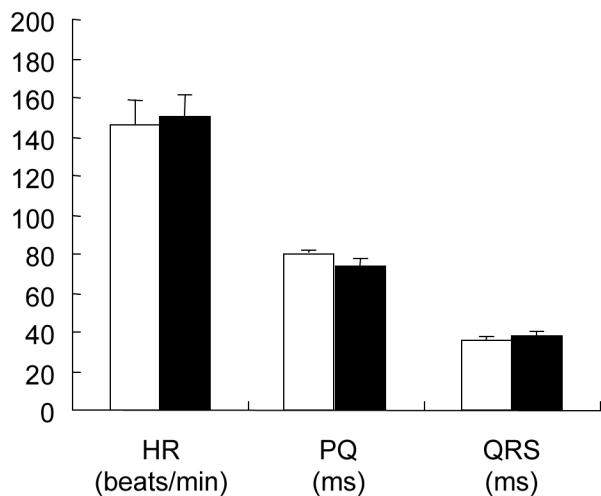**B**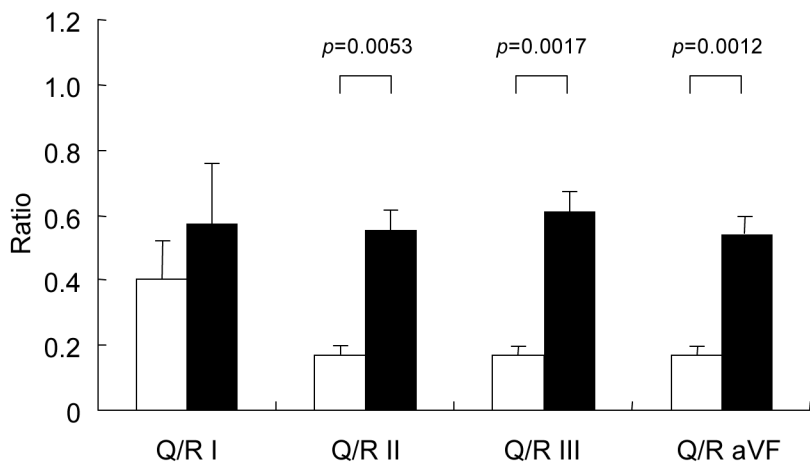

Supplement: MOESM2 [file 9431100]
